# Supplementary material
Source: MDPI journal article supplement (doi:10.3390/jmse14111044)
Supplement: s1 [file jmse-4326807-supplementary.pdf › jmse-4326807-supplementary.pdf]

## Supplementary Materials

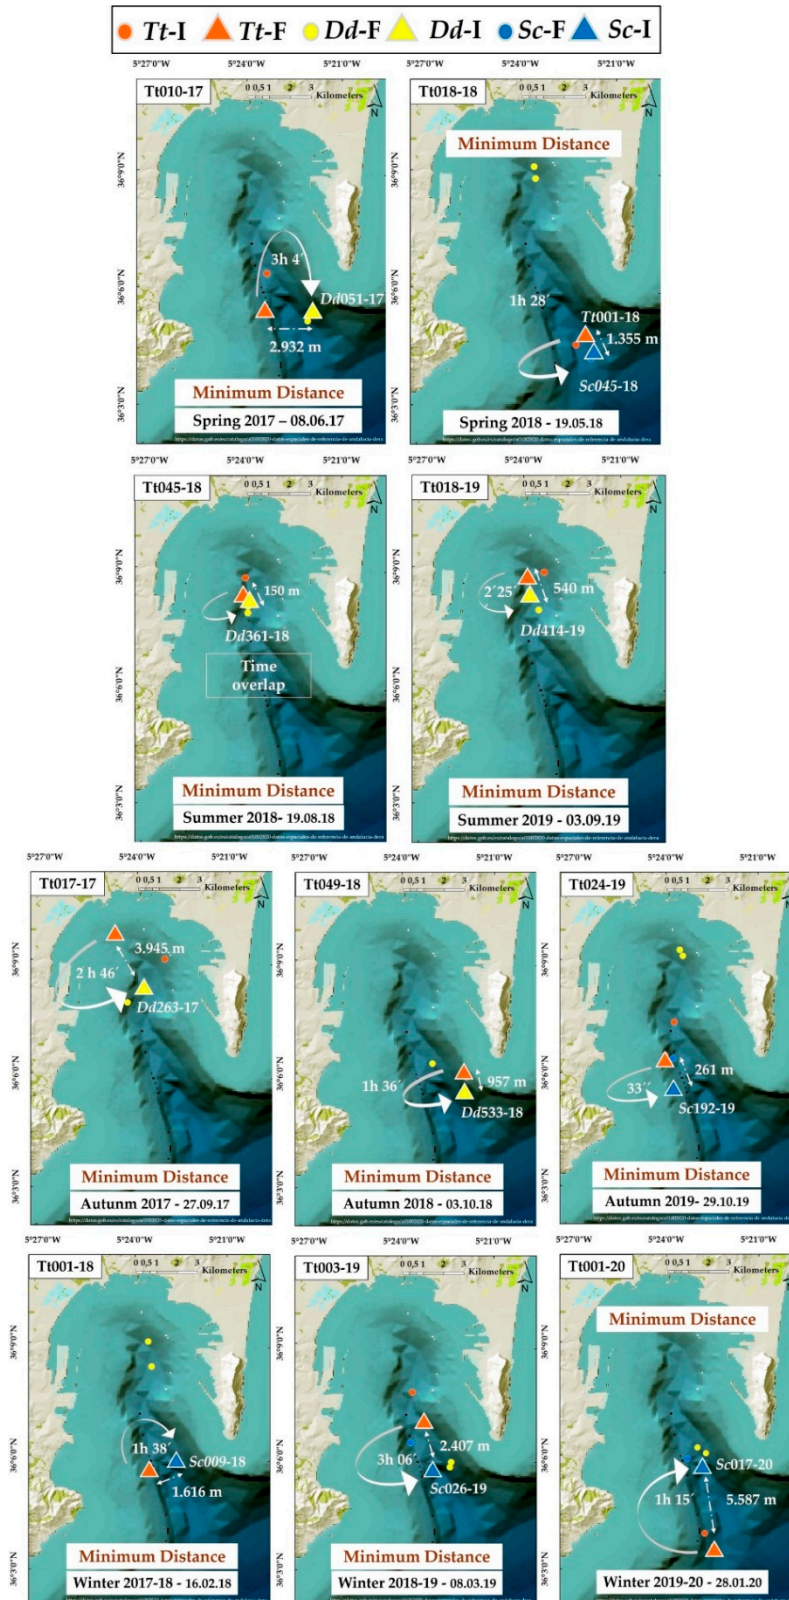

**Figure S1.** Georeferenced maps showing the minimum recorded distances (m) between sightings of *Tursiops truncatus* and subsequent sightings of *Delphinus delphis* and/or *Stenella coeruleoalba* in the Bay of Algeciras–Gibraltar (BA-G). Elapsed time between sightings is also shown. The initial position of *T. truncatus* is represented by an orange circle (Tt-I), and the final position of *T. truncatus* by an orange triangle (Tt-F). For the subsequent species involved in each minimum-distance event, the initial position is represented by a

triangle in the corresponding species colour, and the complementary/final position by a circle. Thus, *D. delphis* is represented by a yellow triangle (*Dd*-I) and a yellow circle (*Dd*-F) when it is the species involved in the event, and *S. coeruleoalba* by a blue triangle (*Sc*-I) and a blue circle (*Sc*-F) when it is the species involved in the event. In some panels (Tt018-18, Tt024-19, Tt001-18 and Tt001-20), yellow circles also indicate georeferenced positions of *D. delphis* recorded within the same sequential context when *D. delphis* was observed together with *S. coeruleoalba* but was not part of the specific minimum-distance event illustrated. Elapsed time is expressed in hours and minutes or in minutes and seconds, depending on the event shown; single quotation marks denote minutes (') and double quotation marks denote seconds (").

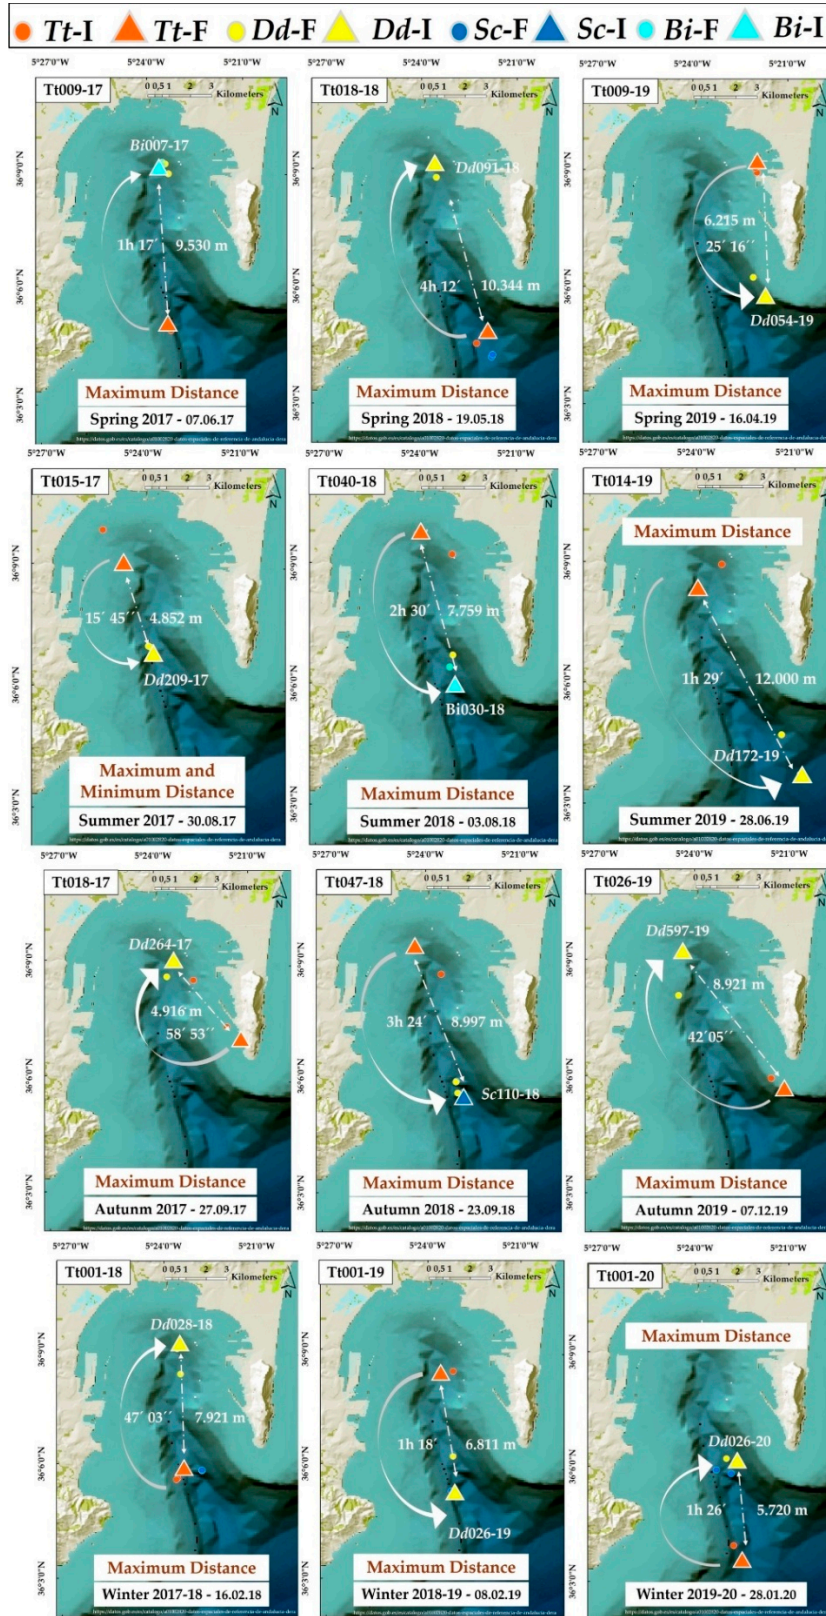

**Figure S2.** Georeferenced maps showing the maximum recorded distances (m) between sightings of *Tursiops truncatus* and subsequent sightings of *Delphinus delphis*, *Stenella coeruleoalba*, and/or Billie (Bi(Tt)) in the Bay of Algeciras–Gibraltar (BA-G). The elapsed time between sightings is also shown in each panel. The initial and final positions of each sighting are represented as follows: *T. truncatus* initial position, orange circle (Tt-I); *T. truncatus* final position, orange triangle (Tt-F); *D. delphis* final position, yellow circle (Dd-F); *D. delphis* initial position, yellow triangle (Dd-I); *S. coeruleoalba* final position, blue circle (Sc-F); *S. coeruleoalba* initial position, blue triangle (Sc-I); Billie final position, turquoise circle (Bi-F); and Billie initial position, turquoise

triangle (Bi-I). The maximum distance was calculated from the final position of the *T. truncatus* sighting, represented by the orange triangle, to the initial position of the subsequent species sighting, represented by the triangle in the corresponding species colour. The complementary positions within the same sighting sequence are represented by circles. Elapsed time is expressed in hours, minutes, and/or seconds as appropriate; single quotation marks denote minutes (') and double quotation marks denote seconds (").

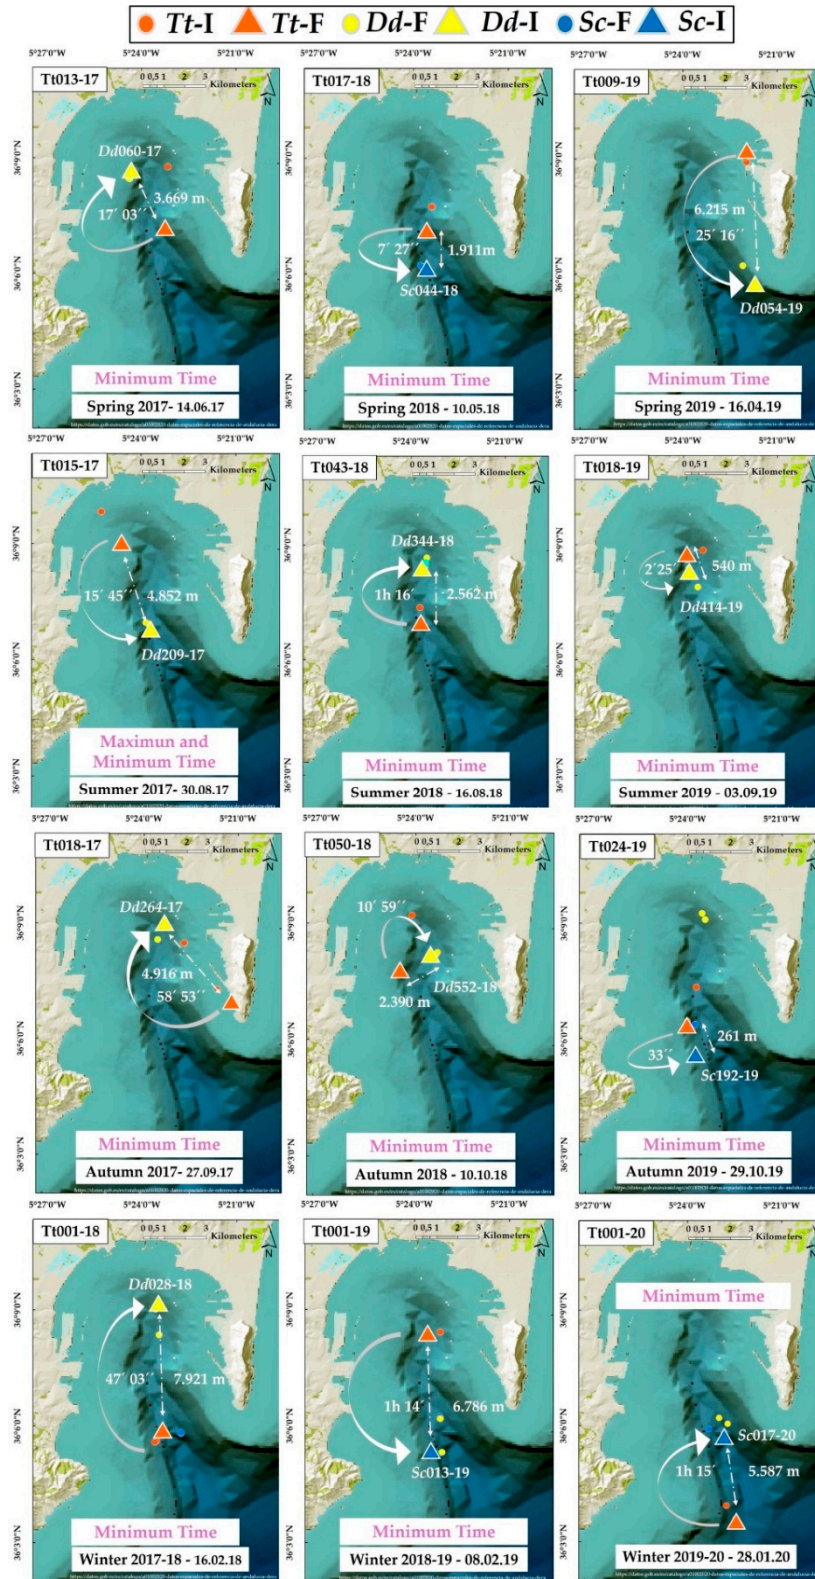

**Figure S3.** Georeferenced maps showing the minimum recorded elapsed times between sightings of *Tursiops truncatus* and subsequent sightings of *Delphinus delphis* and/or *Stenella coeruleoalba* in the Bay of Algeciras–Gibraltar (BA-G). Distances recorded between sightings (m) are also shown. The initial position of *T. truncatus* is

represented by an orange circle (*Tt*-I), and the final position of *T. truncatus* by an orange triangle (*Tt*-F). For the subsequent species involved in each minimum-time event, the initial position is represented by a triangle in the corresponding species colour, and the complementary/final position by a circle. Thus, *D. delphis* is represented by a yellow triangle (*Dd*-I) and a yellow circle (*Dd*-F) when it is the species involved in the event, and *S. coeruleoalba* by a blue triangle (*Sc*-I) and a blue circle (*Sc*-F) when it is the species involved in the event. In some panels (Tt024-19, Tt001-19 and Tt001-20), yellow circles also indicate georeferenced positions of *D. delphis* recorded within the same sequential context when *D. delphis* was observed together with *S. coeruleoalba* but was not part of the specific minimum-time event illustrated. Elapsed time is expressed in hours and minutes or in minutes and seconds, depending on the event shown; single quotation marks denote minutes (') and double quotation marks denote seconds (").

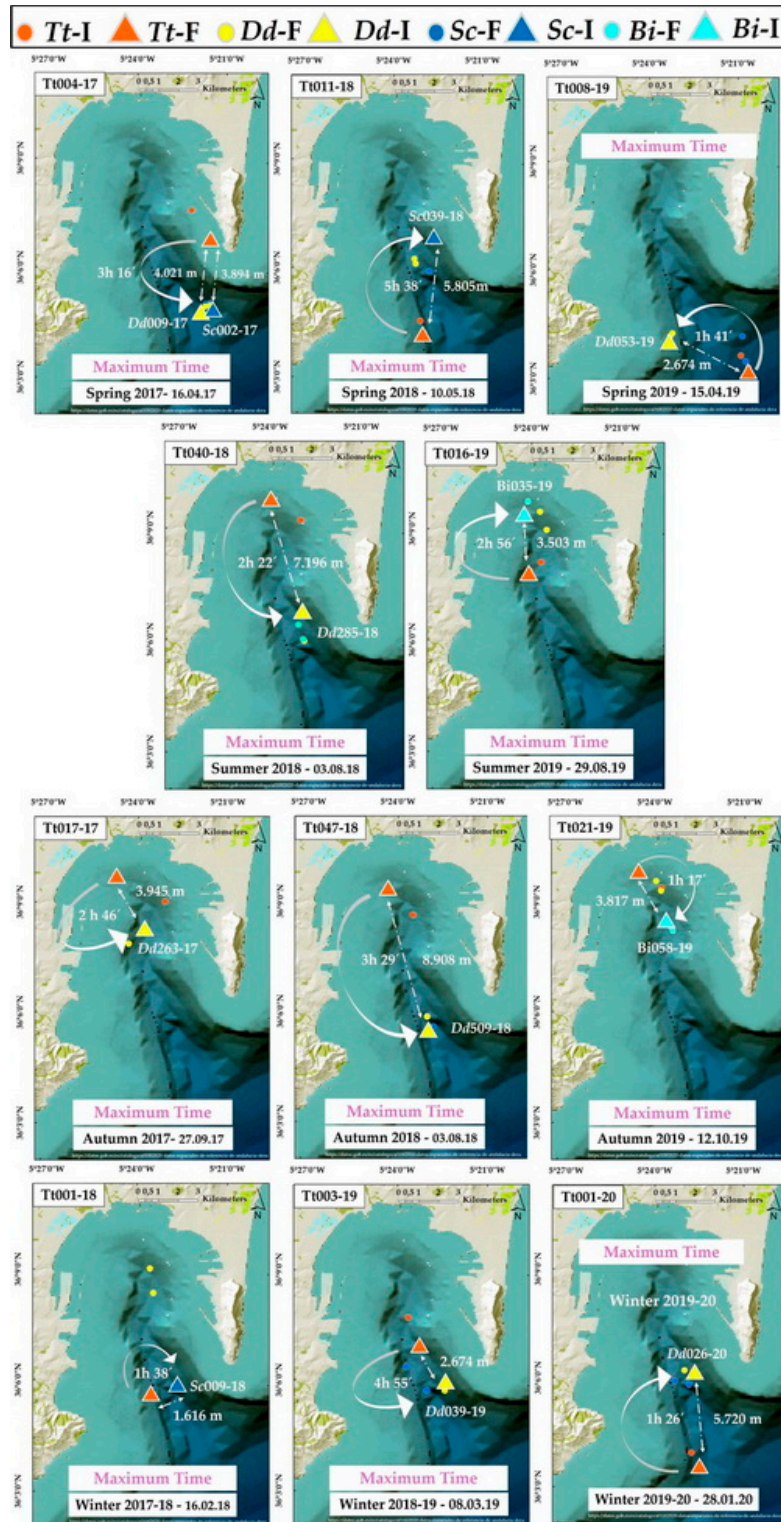

**Figure S4.** Georeferenced maps showing the maximum recorded elapsed times between sightings of *Tursiops truncatus* and subsequent sightings of *Delphinus delphis* and/or *Stenella coeruleoalba* in the Bay of Algeciras-Gibraltar (BA-G). Distances recorded between sightings (m) are also shown. The initial position of *T. truncatus* is represented by an orange circle (Tt-I), and the final position of *T. truncatus* by an orange triangle (Tt-F). For the subsequent species involved in each maximum-time event, the initial position is represented by a triangle in the corresponding species colour, and the complementary/final position by a circle. Thus, *D. delphis* is represented by a yellow triangle (Dd-I) and a yellow circle (Dd-F) when it is the species involved in the event, and *S. coeruleoalba* by a blue triangle (Sc-I) and a blue circle (Sc-F) when it is the species involved in the event. In some panels (Tt011-18, Tt016-19, Tt021-19 and Tt001-18), yellow circles also indicate georeferenced positions of *D. delphis* recorded within the same sequential context when *D.*

*delphis* was observed together with *S. coeruleoalba* but was not part of the specific maximum-time event illustrated. Elapsed time is expressed in hours and minutes or in minutes and seconds, depending on the event shown; single quotation marks denote minutes (') and double quotation marks denote seconds (").

**Table S1.** Sightings of *Delphinus delphis* (Dd), *Stenella coeruleoalba* (Sc) and Billie (Bi(Tt)) just before and after sightings of *Tursiops truncatus* (Tt); 2017-18.

| Date        | Species code | Duration | Initial time | Initial latitude | Initial longitude | Final time | Final latitude | Final longitude | Heading | Quadrant | Total individuals |
|-------------|--------------|----------|--------------|------------------|-------------------|------------|----------------|-----------------|---------|----------|-------------------|
| 25.03.2017  | Tt001-17     | 26       | 12:06:46     | 36.14222         | -5.386871         | 12:32:09   | 36.1232        | -5.383953       | 190.23  | S        | 20                |
| 25.03. 2017 | No dolphins  |          | 13:00:00     |                  |                   | 15:00:00   |                |                 |         |          |                   |
| 31.03. 2017 | Tt003-17     | 15       | 08:41:51     | 36.06824         | -5.378948         | 08:56:11   | 36.08056       | -5.378947       | 118.38  | E        | 35                |
| 16.04. 2017 | No dolphins  |          | 07:49        |                  |                   | 09:04      |                |                 |         |          |                   |
| 16.04. 2017 | Tt004-17     | 35       | 10:46:00     | 36.12792         | -5.367897         | 11:21:39   | 36.11327       | -5.356628       | 8.97    | N        | 30                |
| 16.04. 2017 | No dolphins  |          | 12.08        |                  |                   | 13:16      |                |                 |         |          |                   |
| 16.04. 2017 | Sc002-17     | 7        | 14:37:43     | 36.08506         | -5.358849         | 14:44:55   | 36.08565       | -5.356215       | 34.78   | N        | 5                 |
| 16.04. 2017 | Dd009-17     | 7        | 14:37:43     | 36.08406         | -5.358949         | 14:44:55   | 36.08465       | -5.356315       | 34.78   | N        | 20                |
| 24.04. 2017 | Sc008-17     | 3        | 07:06:50     | 36.1575          | -5.386737         | 07:09:51   | 36.15652       | -5.386535       | 51.15   | E        | 3                 |
| 24.04. 2017 | Tt005-17     | 3        | 07:21:35     | 36.1184          | -5.383423         | 07:47:19   | 36.11189       | -5.36586        | 195.51  | S        | 5                 |
| 24.04. 2017 | No dolphins  |          | 08:51        |                  |                   | 10:08      |                |                 |         |          |                   |
| 02.05. 2017 | Dd017-17     | 12       | 08:01:06     | 36.16097         | -5.401606         | 08:13:52   | 36.15599       | -5.396324       | 291.62  | W        | 10                |
| 02.05. 2017 | Tt007-17     | 22       | 13:34:00     | 36.14547         | -5.382154         | 13:56:21   | 36.12807       | -5.384346       | 178.06  | S        | 30                |
| 02.06. 2017 | Dd034-17     | 6        | 11:14:46     | 36.14822         | -5.386777         | 11:20:50   | 36.14869       | -5.38683        | 198.66  | S        | 50                |
| 02.06. 2017 | Tt008-17     | 10       | 14:01:09     | 36.08362         | -5.38041          | 14:11:00   | 36.0775        | -5.379702       | 245.09  | W        | 25                |
| 07.06. 2017 | Dd046-17     | 11       | 07:53:40     | 36.13239         | -5.39334          | 08:04:13   | 36.13845       | -5.395974       | 139.93  | S        | 50                |
| 07.06. 2017 | Dd047-17     | 12       | 10:48:10     | 36.14197         | -5.392905         | 11:00:22   | 36.14341       | -5.397942       | 321.93  | N        | 100               |
| 07.06. 2017 | Tt009-17     | 9        | 11:29:47     | 36.08296         | -5.383852         | 11:38:56   | 36.0839        | -5.384265       | 136.23  | S        | 15                |
| 07.06. 2017 | Dd048-17     | 8        | 12:44:19     | 36.14931         | -5.3874           | 12:52:43   | 36.15348       | -5.389135       | 285.03  | W        | 21                |
| 07.06. 2017 | Bi(Tt)007-17 | 3        | 12:55:13     | 36.1542          | -5.390651         | 12:58:58   | 36.15273       | -5.390899       | 215.47  | S        | 1                 |
| 07.06. 2017 | Dd049-17     | 8        | 13:14:10     | 36.14532         | -5.397013         | 13:22:22   | 36.14312       | -5.391779       | 122.62  | E        | 50                |
| 08.06. 2017 | Tt010-17     | 23       | 11:05:28     | 36.10706         | -5.387138         | 11:28:35   | 36.09127       | -5.388315       | 303.94  | W        | 12                |
| 08.06. 2017 | Dd051-17     | 21       | 14:33:12     | 36.08724         | -5.364967         | 14:54:14   | 36.09103       | -5.361981       | 146.5   | S        | 200               |
| 14.06. 2017 | Dd059-17     | 25       | 07:55:48     | 36.07818         | -5.366364         | 08:20:39   | 36.07903       | -5.374995       | 304.5   | W        | 70                |
| 14.06. 2017 | Tt013-17     | 36       | 10:44:55     | 36.14754         | -5.384825         | 11:10:17   | 36.12093       | -5.384825       | 308.54  | W        | 5                 |
| 14.06. 2017 | Dd060-17     | 5        | 11:27:20     | 36.14186         | -5.404943         | 11:32:47   | 36.14202       | -5.405433       | 243.61  | W        | 15                |
| 30.08. 2017 | Dd206-17     | 20       | 10:46:46     | 36.14875         | -5.388972         | 11:13:14   | 36.1503        | -5.396779       | 226.42  | W        | 70                |
| 30.08. 2017 | Dd207-17     | 20       | 11:15:16     | 36.14923         | -5.396855         | 11:26:47   | 36.15646       | -5.400721       | 182.47  | S        | 30                |
| 30.08. 2017 | Dd208-17     | 35       | 12:24:10     | 36.15329         | -5.389119         | 12:57:22   | 36.15926       | -5.399418       | 285.22  | W        | 400               |
| 30.08. 2017 | Bi(Tt)025-17 | 5        | 12:40:43     | 36.15815         | -5.397795         | 12:43:57   | 36.15839       | -5.397984       | 339.77  | N        | 1                 |
| 30.08. 2017 | Tt014-17     | 2        | 13:05:06     | 36.15192         | -5.387067         | 13:07:34   | 36.15175       | -5.383793       | 74.22   | E        | 3                 |
| 30.08. 2017 | Tt015-17     | 29       | 13:58:21     | 36.16439         | -5.420205         | 14:27:00   | 36.1497        | -5.408976       | 277.99  | W        | 10                |
| 30.08. 2017 | Dd209-17     | 4        | 14:42:45     | 36.11658         | -5.393854         | 14:47:12   | 36.11721       | -5.395307       | 170.91  | S        | 300               |
| 07.09. 2017 | Tt016-17     | 41       | 08:47:48     | 36.15031         | -5.384709         | 09:28:09   | 36.16395       | -5.411087       | 330.04  | N        | 20                |
| 27.09. 2017 | Tt017-17     | 30       | 07:29:04     | 36.1516          | -5.383934         | 08:03:32   | 36.16276       | -5.4111         | 290.59  | W        | 20                |
| 27.09. 2017 | Dd263-17     | 20       | 10:49:51     | 36.13758         | -5.394615         | 11:16:56   | 36.13218       | -5.403663       | 249.43  | W        | 200               |
| 27.09. 2017 | Tt018-17     | 30       | 12:41:10     | 36.14295         | -5.37735          | 13:14:45   | 36.12314       | -5.358829       | 173.34  | S        | 10                |
| 27.09. 2017 | Dd264-17     | 10       | 14:12:38     | 36.14957         | -5.38835          | 14:21:34   | 36.14406       | -5.39156        | 269.78  | W        | 50                |
| 18.11. 2017 | Tt019-17     | 1        | 09:05:46     | 36.1197          | -5.34115          | 09:07:01   | 36.1201        | -5.34125        | 0       | N        | 2                 |
| 18.11. 2017 | Dd332-17     | 10       | 09:59:25     | 36.15012         | -5.35437          | 10:06:37   | 36.15012       | -5.3911         | 0       | N        | 120               |
| 16.02.2018  | Tt001-18     | 8        | 12:28:19     | 36.09512         | -5.389699         | 12:36:15   | 36.09455       | -5.390411       | 187.73  | S        | 20                |
| 16.02. 2018 | Dd028-18     | 15       | 13:23:18     | 36.15163         | -5.391695         | 13:35:50   | 36.14066       | -5.389565       | 193.33  | S        | 200               |
| 16.02. 2018 | Sc009-18     | 1        | 14:14:40     | 36.09843         | -5.376763         | 14:14:48   | 36.09896       | -5.376729       | 356     | W        | 15                |
| 12.03. 2018 | Tt002-18     | 32       | 12:12:44     | 36.13914         | -5.397666         | 12:39:53   | 36.14957       | -5.402726       | 213.41  | S        | 2                 |

|             |          |    |          |          |           |          |          |           |        |   |   |
|-------------|----------|----|----------|----------|-----------|----------|----------|-----------|--------|---|---|
| 12.03. 2018 | Dd047-18 | 32 | 13:27:51 | 36.15042 | -5.382109 | 13:58:47 | 36.14637 | -5.390097 | 178.62 | S | 7 |
|-------------|----------|----|----------|----------|-----------|----------|----------|-----------|--------|---|---|

**Table S2.** Sightings of *Delphinus delphis* (*Dd*). *Stenella coeruleoalba* (*Sc*) and Billie (Bi(*Tt*)) just before and after sightings of *Tursiops truncatus* (*Tt*); 2018-19.

| Date       | Species code | Duration | Initial time | Initial latitude | Initial longitude | Final time | Final latitude | Final longitude | Heading | Quadrant | Total individuals |
|------------|--------------|----------|--------------|------------------|-------------------|------------|----------------|-----------------|---------|----------|-------------------|
| 20.03.2018 | Tt003-18     | 15       | 12:12:35     | 36.08469         | -5.394074         | 12:32:26   | 36.07715       | -5.402146       | 162.31  | S        | 60                |
| 28.03.2018 | Tt004-18     | 15       | 12:59:44     | 36.10183         | -5.345702         | 13:11:42   | 36.10169       | -5.349485       | 71.27   | E        | 3                 |
| 03.04.2018 | Tt005-18     | 11       | 11:45:33     | 36.05898         | -5.371932         | 11:56:58   | 36.05873       | -5.368393       | 107.85  | E        | 30                |
| 03.04.2018 | Tt006-18     | 29       | 12:51:24     | 36.14873         | -5.385234         | 13:19:28   | 36.16002       | -5.401984       | 3.88    | N        | 20                |
| 04.04.2018 | Tt007-18     | 30       | 10:48:46     | 36.14631         | -5.386497         | 11:23:00   | 36.15658       | -5.404387       | 136.52  | S        | 15                |
| 26.04.2018 | Tt008-18     | 4        | 08:34:24     | 36.10172         | -5.357911         | 08:37:46   | 36.10339       | -5.356817       | 358.24  | W        | 10                |
| 26.04.2018 | Tt009-18     | 22       | 09:43:17     | 36.12844         | -5.396472         | 10:07:51   | 36.12444       | -5.390071       | 80.01   | E        | 20                |
| 26.04.2018 | Dd066-18     | 10       | 11:43:35     | 36.07479         | -5.382119         | 11:53:52   | 36.0769        | -5.3794         | 162.31  | S        | 20                |
| 06.05.2018 | Tt010-18     | 30       | 12:17:56     | 36.15317         | -5.388549         | 12:46:14   | 36.1672        | -5.405847       | 332.27  | W        | 15                |
| 10.05.2018 | Tt011-18     | 15       | 09:24:18     | 36.07701         | -5.381778         | 09:38:10   | 36.07168       | -5.37971        | 77.48   | E        | 7                 |
| 10.05.2018 | Dd079-18     | 5        | 11:50:54     | 36.10543         | -5.385907         | 11:53:04   | 36.10331       | -5.38509        | 155.74  | S        | 4                 |
| 10.05.2018 | Dd081-18     | 15       | 15:12:16     | 36.09468         | -5.382133         | 15:26:20   | 36.0999        | -5.377212       | 112.05  | E        | 40                |
| 10.05.2018 | Sc039-18     | 15       | 15:16:57     | 36.11352         | -5.376177         | 15:26:20   | 36.0999        | -5.377212       | 16.4    | N        | 2                 |
| 11.05.2018 | Tt012-18     | 6        | 11:23:15     | 36.1044          | -5.370375         | 11:28:19   | 36.11013       | -5.371499       | 24.39   | N        | 30                |
| 11.05.2018 | Dd083-18     | 44       | 12:37:52     | 36.15801         | -5.393946         | 13:21:00   | 36.15835       | -5.396739       | 293.39  | W        | 2                 |
| 11.05.2018 | Sc041-18     | 4        | 12:38:03     | 36.15819         | -5.394351         | 12:42:15   | 36.15875       | -5.396225       | 300.84  | W        | 4                 |
| 11.05.2018 | Tt013-18     | 24       | 12:48:51     | 36.15155         | -5.391714         | 13:14:07   | 36.14701       | -5.395844       | 31.63   | N        | 20                |
| 11.05.2018 | Tt014-18     | 20       | 14:31:03     | 36.09806         | -5.392909         | 14:51:34   | 36.09451       | -5.363341       | 110.28  | E        | 20                |
| 16.05.2018 | Tt015-18     | 21       | 12:41:00     | 36.14949         | -5.388628         | 13:02:56   | 36.16288       | -5.398423       | 35      | N        | 20                |
| 16.05.2018 | Tt016-18     | 14       | 13:25:52     | 36.1129          | -5.398689         | 13:39:38   | 36.10709       | -5.392058       | 127.19  | E        | 30                |
| 19.05.2018 | Tt017-18     | 24       | 07:42:25     | 36.1304          | -5.388497         | 08:06:21   | 36.1194        | -5.391899       | 143.29  | S        | 20                |
| 19.05.2018 | Sc044-18     | 6        | 08:13:48     | 36.10509         | -5.39337          | 08:18:27   | 36.10462       | -5.392922       | 198.32  | S        | 30                |
| 19.05.2018 | Tt018-18     | 11       | 09:46:19     | 36.0771          | -5.367734         | 09:57:51   | 36.08101       | -5.364172       | 121     | E        | 17                |
| 19.05.2018 | Sc045-18     | 10       | 11:25:36     | 36.07158         | -5.359626         | 11:30:56   | 36.07257       | -5.359203       | 197.53  | S        | 14                |
| 19.05.2018 | Dd091-18     | 20       | 14:09:56     | 36.15266         | -5.391948         | 14:19:54   | 36.14754       | -5.391088       | 129.11  | E        | 6                 |
| 19.05.2018 | Sc046-18     | 5        | 14:29:55     | 36.12141         | -5.381362         | 14:37:07   | 36.11084       | -5.387527       | 14.92   | N        | 4                 |
| 20.05.2018 | Tt019-18     | 20       | 14:03:50     | 36.10748         | -5.383798         | 14:22:09   | 36.10817       | -5.371676       | 43.42   | N        | 40                |
| 21.05.2018 | Tt020-18     | 10       | 11:25:45     | 36.06594         | -5.353123         | 11:35:59   | 36.07324       | -5.348102       | 56.45   | E        | 20                |
| 21.05.2018 | Dd094-18     | 5        | 15:10:41     | 36.05964         | -5.356036         | 15:14:07   | 36.06347       | -5.351362       | 69.3    | E        | 20                |
| 26.05.2018 | Tt021-18     | 10       | 11:11:01     | 36.10002         | -5.394593         | 11:21:48   | 36.09689       | -5.392241       | 89.78   | E        | 50                |
| 26.05.2018 | Tt022-18     | 20       | 13:36:07     | 36.09277         | -5.385662         | 13:50:43   | 36.09452       | -5.386529       | 333.23  | W        | 50                |
| 26.05.2018 | Tt023-18     | 10       | 17:03:59     | 36.09664         | -5.309816         | 17:12:09   | 36.10096       | -5.30468        | 28.33   | N        | 50                |
| 28.05.2018 | Tt024-18     | 12       | 13:22:41     | 36.09307         | -5.389095         | 13:34:28   | 36.08925       | -5.386863       | 142.31  | S        | 50                |
| 29.05.2018 | Tt025-18     | 20       | 11:34:08     | 36.11687         | -5.385142         | 11:52:08   | 36.10649       | -5.391272       | 82.04   | E        | 20                |
| 29.05.2018 | Tt026-18     | 15       | 14:34:12     | 36.0954          | -5.388249         | 14:49:45   | 36.09431       | -5.386535       | 160.37  | S        | 50                |
| 29.05.2018 | No dolphins  | 20       | 15:14        |                  |                   | 15:34      |                |                 |         |          |                   |
| 01.06.2018 | Tt027-18     | 13       | 15:05:50     | 36.06718         | -5.378695         | 15:18:12   | 36.07304       | -5.378193       | 25.82   | N        | 50                |
| 01.06.2018 | Tt028-18     | 17       | 16:53:12     | 36.06738         | -5.38152          | 17:10:04   | 36.08238       | -5.378837       | 116.95  | E        | 50                |
| 01.06.2018 | Dd100-18     | 7        | 15:18:15     | 36.11031         | -5.37435          | 15:25:49   | 36.12502       | -5.376395       | 336.68  | W        | 40                |
| 02.06.2018 | Tt029-18     | 45       | 16:12:50     | 36.10748         | -5.383798         | 16:57:10   | 36.10817       | -5.371676       | 167.82  | S        | 50                |
| 06.06.2018 | Tt030-18     | 14       | 15:03:16     | 36.07053         | -5.379104         | 15:17:25   | 36.06865       | -5.380109       | 144.73  | S        | 50                |
| 06.06.2018 | Dd102-18     | 14       | 15:25:16     | 36.09925         | -5.371726         | 15:39:40   | 36.10088       | -5.371295       | 13.85   | N        | 10                |
| 06.06.2018 | Sc051-18     | 6        | 14:53:51     | 36.0695          | -5.359048         | 14:59:53   | 36.07336       | -5.353475       | 40.51   | N        | 20                |
| 06.06.2018 | Dd103-18     | 9        | 15:00:32     | 36.07344         | -5.352117         | 15:09:53   | 36.08041       | -5.35341        | 82.62   | E        | 40                |

|            |              |    |          |          |           |          |          |           |        |   |     |
|------------|--------------|----|----------|----------|-----------|----------|----------|-----------|--------|---|-----|
| 08.06.2018 | Ti031-18     | 27 | 14:41:23 | 36.11345 | -5.392812 | 15:08:11 | 36.10019 | -5.3865   | 346.7  | W | 32  |
| 10.06.2018 | Ti032-18     | 20 | 08:10:49 | 36.08138 | -5.380735 | 08:30:51 | 36.09125 | -5.380119 | 128.42 | E | 50  |
| 30.06.2018 | Ti033-18     | 16 | 09:12:40 | 36.07001 | -5.359575 | 09:28:20 | 36.07688 | -5.337633 | 149.76 | S | 6   |
| 30.06.2018 | Dd157-18     | 4  | 10:56:20 | 36.11416 | -5.377629 | 11:00:42 | 36.10746 | -5.375198 | 143.17 | S | 20  |
| 30.06.2018 | Dd161-18     | 5  | 16:59:43 | 36.117   | -5.378897 | 17:04:12 | 36.11312 | -5.378447 | 199.21 | S | 10  |
| 01.07.2018 | Ti034-18     | 4  | 09:18:49 | 36.11631 | -5.374353 | 09:22:27 | 36.11645 | -5.374817 | 158.93 | S | 8   |
| 01.07.2018 | Ti035-18     | 28 | 12:18:14 | 36.14632 | -5.388296 | 12:46:46 | 36.14462 | -5.394444 | 180.14 | S | 10  |
| 13.07.2018 | Ti036-18     | 6  | 14:51:11 | 36.0908  | -5.358445 | 14:57:41 | 36.08584 | -5.35257  | 124.76 | E | 8   |
| 19.07.2018 | Ti037-18     | 2  | 14:31:31 | 36.1572  | -5.402759 | 15:33:10 | 36.12284 | -5.402183 | 296.2  | W | 23  |
| 01.08.2018 | Ti038-18     | 34 | 14:48:00 | 36.13073 | -5.394515 | 15:22:01 | 36.11219 | -5.39893  | 201.01 | S | 10  |
| 01.08.2018 | Sc080-18     | 30 | 14:18:10 | 36.1496  | -5.390656 | 14:48:24 | 36.14986 | -5.39913  | 209.06 | S | 20  |
| 01.08.2018 | Dd280-18     | 1  | 14:46:51 | 36.15096 | -5.399112 | 14:47:59 | 36.15003 | -5.399201 | 242.57 | W | 100 |
| 01.08.2018 | Dd281-18     | 34 | 15:34:01 | 36.14636 | -5.393053 | 16:08:40 | 36.14369 | -5.388847 | 187.48 | S | 40  |
| 02.08.2018 | Ti039-18     | 33 | 12:26:19 | 36.13078 | -5.392875 | 12:59:58 | 36.14896 | -5.393732 | 310.31 | W | 40  |
| 02.08.2018 | Dd283-18     | 5  | 14:21:44 | 36.12984 | -5.390348 | 14:26:47 | 36.1285  | -5.38736  | 33.2   | N | 9   |
| 02.08.2018 | Dd284-18     | 4  | 14:29:34 | 36.12394 | -5.386033 | 14:33:17 | 36.12565 | -5.389651 | 267.55 | W | 240 |
| 02.08.2018 | Bi(Ti)029-18 | 1  | 14:51:02 | 36.12029 | -5.38788  | 14:51:11 | 36.12029 | -5.38788  | 257.71 | W | 1   |
| 03.08.2018 | Ti040-18     | 34 | 12:44:24 | 36.15487 | -5.382234 | 13:18:12 | 36.16267 | -5.401093 | 310.33 | W | 35  |
| 03.08.2018 | Dd285-18     | 13 | 15:40:40 | 36.11314 | -5.380587 | 15:53:28 | 36.10106 | -5.37883  | 192.91 | S | 260 |
| 03.08.2018 | Bi(Ti)030-18 | 5  | 15:48:35 | 36.1082  | -5.38217  | 15:53:11 | 36.10187 | -5.37937  | 179.98 | S | 1   |
| 16.08.2018 | Ti041-18     | 20 | 07:34:15 | 36.15023 | -5.393595 | 07:54:09 | 36.16133 | -5.403041 | 311.8  | W | 50  |
| 16.08.2018 | Ti042-18     | 31 | 09:18:32 | 36.151   | -5.389585 | 09:49:38 | 36.13199 | -5.390463 | 201.16 | S | 50  |
| 16.08.2018 | Ti043-18     | 11 | 11:03:51 | 36.12404 | -5.393425 | 11:14:13 | 36.11859 | -5.392499 | 190.57 | S | 15  |
| 16.08.2018 | Dd344-18     | 23 | 12:30:25 | 36.1419  | -5.39132  | 12:53:41 | 36.14381 | -5.390531 | 313.01 | W | 80  |
| 16.08.2018 | Bi(Ti)037-18 | 9  | 12:44:38 | 36.14275 | -5.391019 | 12:53:23 | 36.14363 | -5.390886 | 75.88  | E | 1   |
| 16.08.2018 | Dd346-18     | 32 | 15:32:44 | 36.14806 | -5.392048 | 16:04:37 | 36.1493  | -5.382483 | 202.42 | S | 85  |
| 16.08.2018 | Bi(Ti)038-18 | 11 | 15:40:06 | 36.14851 | -5.398092 | 15:51:50 | 36.14616 | -5.394197 | 189.64 | S | 1   |
| 19.08.2018 | Ti044-18     | 17 | 10:53:09 | 36.13395 | -5.388354 | 11:10:47 | 36.13394 | -5.388354 | 29.58  | N | 9   |
| 19.08.2018 | Dd359-18     | 22 | 10:53:09 | 36.14243 | -5.389265 | 11:07:06 | 36.13664 | -5.389988 | 186.42 | S | 37  |
| 19.08.2018 | Dd360-18     | 20 | 12:21:54 | 36.15292 | -5.388137 | 12:38:54 | 36.1424  | -5.3871   | 80.58  | E | 7   |
| 19.08.2018 | Ti045-18     | 16 | 14:46:28 | 36.14654 | -5.398898 | 15:02:05 | 36.1371  | -5.397836 | 189.22 | S | 8   |
| 19.08.2018 | Dd361-18     | 1  | 15:01:00 | 36.13159 | -5.397099 | 15:06:34 | 36.13131 | -5.397168 | 194.83 | S | 70  |
| 31.08.2018 | Ti046-18     | 33 | 10:16:57 | 36.1605  | -5.397548 | 10:49:25 | 36.14036 | -5.392377 | 310.58 | W | 18  |
| 31.08.2018 | Dd420-18     | 10 | 11:58:41 | 36.14018 | -5.390087 | 12:08:24 | 36.14676 | -5.392687 | 52.83  | E | 8   |
| 31.08.2018 | Dd422-18     | 31 | 15:14:53 | 36.15722 | -5.392265 | 15:45:47 | 36.14284 | -5.389982 | 212.65 | S | 70  |
| 23.09.2018 | Ti047-18     | 34 | 08:19:30 | 36.14504 | -5.390498 | 08:53:54 | 36.15587 | -5.404138 | 265.52 | W | 28  |
| 23.09.2018 | Sc110-18     | 16 | 12:17:49 | 36.09459 | -5.377389 | 12:33:50 | 36.09924 | -5.380987 | 125.83 | E | 77  |
| 23.09.2018 | Dd509-18     | 11 | 12:22:51 | 36.09419 | -5.380054 | 12:33:28 | 36.099   | -5.381072 | 291.66 | W | 40  |
| 23.09.2018 | Dd510-18     | 30 | 13:29:06 | 36.11064 | -5.385218 | 13:59:47 | 36.13145 | -5.399112 | 257.08 | W | 190 |
| 25.09.2018 | Ti048-18     | 9  | 12:19:06 | 36.11378 | -5.393743 | 12:28:04 | 36.10722 | -5.393012 | 163.11 | S | 37  |
| 25.09.2018 | Dd515-18     | 18 | 13:21:03 | 36.15694 | -5.397186 | 13:39:37 | 36.15714 | -5.399805 | 319.44 | W | 57  |
| 03.10.2018 | Ti049-18     | 1  | 14:08:23 | 36.10044 | -5.362484 | 14:08:51 | 36.10155 | -5.36264  | 355.21 | W | 17  |
| 03.10.2018 | Dd533-18     | 27 | 15:44:50 | 36.09464 | -5.363231 | 16:11:47 | 36.10597 | -5.380976 | 272.25 | W | 30  |
| 10.10.2018 | Ti050-18     | 39 | 15:14:22 | 36.15449 | -5.401082 | 15:53:03 | 36.12936 | -5.406819 | 211.29 | S | 15  |
| 10.10.2018 | Dd552-18     | 1  | 16:03:02 | 36.13795 | -5.387764 | 16:04:59 | 36.1389  | -5.387053 | 17.49  | N | 80  |
| 13.10.2018 | Ti051-18     | 25 | 13:49:55 | 36.1146  | -5.381833 | 14:14:23 | 36.12674 | -5.381973 | 313.74 | W | 20  |
| 13.10.2018 | Ti052-18     | 36 | 15:13:08 | 36.159   | -5.389972 | 15:49:17 | 36.16106 | -5.40594  | 346.46 | W | 20  |

|            |          |    |          |          |           |          |          |           |        |   |    |
|------------|----------|----|----------|----------|-----------|----------|----------|-----------|--------|---|----|
| 23.10.2018 | Tt053-18 | 44 | 08:53:25 | 36.16166 | -5.391991 | 09:37:02 | 36.17488 | -5.414097 | 225.35 | W | 30 |
| 23.10.2018 | Tt054-18 | 22 | 11:04:18 | 36.12823 | -5.411708 | 11:26:32 | 36.11248 | -5.409235 | 176.36 | S | 17 |
| 11.12.2018 | Tt055-18 | 23 | 13:49:11 | 36.09506 | -5.396338 | 14:12:56 | 36.07958 | -5.385327 | 167.87 | S | 33 |
| 08.02.2019 | Tt001-19 | 37 | 11:50:35 | 36.14175 | -5.384962 | 12:27:06 | 36.13902 | -5.38956  | 185.65 | S | 37 |
| 08.02.2019 | Sc013-19 | 15 | 13:41:18 | 36.08957 | -5.384547 | 13:56:04 | 36.10538 | -5.383908 | 92.49  | E | 25 |
| 08.02.2019 | Dd026-19 | 10 | 13:45:26 | 36.0902  | -5.382428 | 13:55:47 | 36.10462 | -5.38382  | 8.78   | N | 9  |
| 07.03.2019 | Tt002-19 | 35 | 12:12:40 | 36.09217 | -5.389028 | 12:47:54 | 36.1194  | -5.391191 | 102.16 | E | 12 |
| 08.03.2019 | Tt003-19 | 29 | 08:33:44 | 36.12959 | -5.392253 | 09:02:19 | 36.11742 | -5.385527 | 202.92 | S | 12 |
| 08.03.2019 | Sc026-19 | 26 | 12:08:41 | 36.09687 | -5.380888 | 12:34:27 | 36.10745 | -5.392549 | 54.57  | E | 35 |
| 08.03.2019 | Sc027-19 | 13 | 13:34:50 | 36.10773 | -5.389685 | 13:47:53 | 36.11087 | -5.386746 | 100.52 | E | 35 |
| 08.03.2019 | Dd039-19 | 6  | 13:57:49 | 36.09899 | -5.370943 | 14:03:30 | 36.09924 | -5.370348 | 122.2  | E | 7  |
| 09.03.2019 | Tt004-19 | 28 | 11:46:37 | 36.15538 | -5.391366 | 12:14:59 | 36.15303 | -5.403548 | 301.37 | W | 16 |
| 11.03.2019 | Tt005-19 | 21 | 14:14:06 | 36.13787 | -5.387315 | 14:35:22 | 36.12192 | -5.376929 | 162.79 | S | 16 |

**Table S3.** Sightings of *Delphinus delphis* (Dd), *Stenella coeruleoalba* (Sc) and Billie (Bi(Tt)) just before and after sightings of *Tursiops truncatus* (Tt); 2019-20.

| Date        | Species code | Duration | Initial time | Initial latitude | Initial longitude | Final time | Final latitude | Final longitude | Heading | Quadrant | Total individuals |
|-------------|--------------|----------|--------------|------------------|-------------------|------------|----------------|-----------------|---------|----------|-------------------|
| 02.04. 2019 | Tt006-19     | 11       | 12:44:18     | 36.06567         | -5.397319         | 12:55:19   | 36.05503       | -5.405097       | 223.25  | S        | 1                 |
| 14.04. 2019 | Tt007-19     | 12       | 12:50:23     | 36.08813         | -5.346423         | 13:02:30   | 36.07887       | -5.33774        | 142.73  | S        | 100               |
| 15.04. 2019 | Tt008-19     | 10       | 13:30:50     | 36.06274         | -5.344595         | 13:42:00   | 36.05706       | -5.340168       | 160.13  | S        | 23                |
| 15.04. 2019 | Sc035-19     | 5        | 13:35:02     | 36.06011         | -5.341687         | 13:42:00   | 36.07174       | -5.343839       | 116.34  | E        | 14                |
| 15.04. 2019 | Dd053-19     | 7        | 13:22:53     | 36.07093         | -5.384843         | 13:29:16   | 36.07225       | -5.383602       | 207.79  | S        | 30                |
| 16.04. 2019 | Tt009-19     | 8        | 14:10:50     | 36.15055         | -5.3649           | 14:18:24   | 36.15235       | -5.365827       | 290.9   | W        | 6                 |
| 16.04. 2019 | Dd054-19     | 10       | 14:43:40     | 36.10566         | -5.365457         | 14:53:36   | 36.09788       | -5.357873       | 132.65  | E        | 25                |
| 14.05. 2019 | Tt010-19     | 6        | 12:59:46     | 36.14399         | -5.365272         | 13:05:28   | 36.14408       | -5.366927       | 50.12   | E        | 19                |
| 14.05. 2019 | Tt011-19     | 20       | 13:50:42     | 36.14342         | -5.36544          | 14:10:34   | 36.13063       | -5.365236       | 63.83   | E        | 5                 |
| 14.05. 2019 | Tt012-19     | 5        | 14:07:27     | 36.13627         | -5.367737         | 14:12:56   | 36.12646       | -5.365787       | 141.33  | S        | 10                |
| 28.06. 2019 | Tt013-19     | 33       | 11:07:55     | 36.10518         | -5.369            | 11:28:56   | 36.11623       | -5.380164       | 343.76  | W        | 31                |
| 28.06. 2019 | Tt014-19     | 41       | 12:19:24     | 36.15017         | -5.38595          | 13:00:05   | 36.13877       | -5.397972       | 302.66  | W        | 31                |
| 28.06. 2019 | Dd172-19     | 16       | 14:29:35     | 36.06403         | -5.343308         | 14:45:09   | 36.08031       | -5.353352       | 338.99  | W        | 18                |
| 21.07. 2019 | Tt015-19     | 20       | 11:01:08     | 36.08984         | -5.372963         | 11:21:23   | 36.08097       | -5.379963       | 310.79  | W        | 24                |
| 21.07. 2019 | Dd255-19     | 12       | 12:42:37     | 36.05714         | -5.376606         | 12:54:16   | 36.06658       | -5.379569       | 320.22  | W        | 140               |
| 21.07. 2019 | Dd256-19     | 26       | 13:58:02     | 36.123           | -5.387991         | 14:24:19   | 36.14918       | -5.391816       | 174     | S        | 180               |
| 21.07. 2019 | Bi(Tt)021-19 | 34       | 14:11:49     | 36.13806         | -5.390108         | 14:23:23   | 36.14879       | -5.391317       | 334.41  | W        | 1                 |
| 29.08. 2019 | Tt016-19     | 11       | 11:29:41     | 36.13619         | -5.393328         | 11:40:00   | 36.13219       | -5.39922        | 267.77  | W        | 18                |
| 29.08. 2019 | Dd392-19     | 28       | 12:22:16     | 36.15066         | -5.390623         | 12:50:31   | 36.15888       | -5.394444       | 271.47  | W        | 85                |
| 29.08. 2019 | Dd393-19     | 35       | 14:22:03     | 36.15331         | -5.398332         | 14:57:44   | 36.15913       | -5.393815       | 281.36  | W        | 331               |
| 29.08. 2019 | Bi(Tt)035-19 | 12       | 14:36:39     | 36.15777         | -5.40246          | 14:48:20   | 36.1633        | -5.401268       | 110.66  | E        | 1                 |
| 03.09. 2019 | Tt017-19     | 41       | 16:28:58     | 36.13942         | -5.385048         | 17:09:33   | 36.14718       | -5.382796       | 333.3   | W        | 40                |
| 03.09. 2019 | Dd411-19     | 3        | 16:31:17     | 36.13494         | -5.390882         | 16:50:53   | 36.13689       | -5.39014        | 17.79   | N        | 40                |
| 03.09. 2019 | Dd413-19     | 8        | 15:45:17     | 36.15916         | -5.387048         | 15:53:41   | 36.15051       | -5.389197       | 270.99  | W        | 100               |
| 03.09. 2019 | Tt018-19     | 20       | 15:51:37     | 36.14893         | -5.388403         | 16:11:16   | 36.14477       | -5.396499       | 228.69  | W        | 19                |
| 03.09. 2019 | Dd414-19     | 8        | 16:13:41     | 36.1408          | -5.395607         | 16:21:29   | 36.13299       | -5.390604       | 166.13  | S        | 200               |
| 04.09. 2019 | Tt019-19     | 39       | 09:30:17     | 36.14064         | -5.388892         | 10:09:58   | 36.1548        | -5.398684       | 92.16   | E        | 32                |
| 04.09. 2019 | Sc164-19     | 6        | 11:03:40     | 36.12828         | -5.39315          | 11:09:35   | 36.13055       | -5.397252       | 315.47  | W        | 2                 |
| 04.09. 2019 | Dd415-19     | 16       | 11:06:08     | 36.12933         | -5.394775         | 11:22:49   | 36.13566       | -5.396698       | 274.9   | W        | 39                |

|             |              |    |          |          |           |          |          |           |        |   |     |
|-------------|--------------|----|----------|----------|-----------|----------|----------|-----------|--------|---|-----|
| 04.09. 2019 | Dd418-19     | 34 | 15:30:50 | 36.13698 | -5.388808 | 16:04:36 | 36.14976 | -5.391372 | 105.69 | E | 230 |
| 06.09. 2019 | Tt020-19     | 5  | 14:19:41 | 36.11352 | -5.392241 | 14:24:46 | 36.11281 | -5.392555 | 178.82 | S | 18  |
| 06.09. 2019 | Dd428-19     | 32 | 15:18:52 | 36.15286 | -5.387272 | 15:50:32 | 36.1425  | -5.390048 | 321.54 | W | 112 |
| 12.10. 2019 | Tt021-19     | 33 | 09:39:38 | 36.15769 | -5.39546  | 10:12:29 | 36.16316 | -5.407487 | 21.43  | N | 10  |
| 12.10. 2019 | Dd507-19     | 18 | 10:58:38 | 36.15633 | -5.395783 | 11:16:27 | 36.16061 | -5.398698 | 267.66 | W | 40  |
| 12.10. 2019 | Dd508-19     | 5  | 11:29:01 | 36.14038 | -5.3894   | 11:34:09 | 36.13894 | -5.388374 | 194.26 | S | 34  |
| 12.10. 2019 | Bi(Tt)058-19 | 3  | 11:30:06 | 36.13982 | -5.389322 | 11:33:38 | 36.13822 | -5.38864  | 163.14 | S | 1   |
| 12.10. 2019 | Tt022-19     | 38 | 12:43:30 | 36.15417 | -5.393415 | 13:21:08 | 36.12943 | -5.405203 | 241.68 | W | 27  |
| 12.10. 2019 | Dd509-19     | 33 | 14:22:49 | 36.11782 | -5.38094  | 14:55:07 | 36.13911 | -5.396358 | 298.99 | W | 290 |
| 29.10. 2019 | Tt023-19     | 12 | 09:27:44 | 36.11802 | -5.386521 | 09:39:03 | 36.11969 | -5.394838 | 169.63 | S | 24  |
| 29.10. 2019 | Dd547-19     | 2  | 10:24:58 | 36.14241 | -5.38851  | 10:26:26 | 36.14227 | -5.389176 | 252.17 | W | 13  |
| 29.10. 2019 | Tt024-19     | 24 | 10:33:48 | 36.1236  | -5.393682 | 10:57:24 | 36.10676 | -5.397867 | 189.12 | S | 38  |
| 29.10. 2019 | Sc192-19     | 3  | 10:57:57 | 36.10663 | -5.397199 | 11:00:03 | 36.1076  | -5.393763 | 86.89  | E | 41  |
| 29.10. 2019 | Dd548-19     | 6  | 11:47:44 | 36.15561 | -5.3914   | 11:53:04 | 36.15299 | -5.389669 | 108.68 | E | 38  |
| 29.10. 2019 | Sc193-19     | 2  | 12:22:07 | 36.1569  | -5.400228 | 12:24:39 | 36.1571  | -5.397601 | 68.87  | E | 10  |
| 29.10. 2019 | Dd550-19     | 36 | 14:46:10 | 36.14942 | -5.383005 | 15:22:34 | 36.1313  | -5.387937 | 273.07 | W | 4   |
| 04.12. 2019 | Tt025-19     | 30 | 12:18:21 | 36.12909 | -5.389438 | 12:48:12 | 36.15262 | -5.382062 | 336.48 | W | 36  |
| 07.12. 2019 | Tt026-19     | 11 | 12:41:43 | 36.09724 | -5.350678 | 12:52:54 | 36.10102 | -5.356845 | 295.87 | W | 32  |
| 07.12. 2019 | Dd597-19     | 22 | 13:34:59 | 36.153   | -5.404587 | 13:56:31 | 36.13545 | -5.406835 | 230.1  | W | 8   |
| 07.12. 2019 | Dd598-19     | 6  | 14:06:12 | 36.11892 | -5.393763 | 14:12:14 | 36.12457 | -5.395248 | 64.01  | E | 32  |
| 28.01.2020  | Tt001-20     | 27 | 08:46:59 | 36.06719 | -5.375698 | 09:13:44 | 36.06153 | -5.37056  | 183.04 | S | 68  |
| 28.01. 2020 | Sc017-20     | 10 | 10:28:48 | 36.09998 | -5.385921 | 10:38:05 | 36.09845 | -5.378067 | 188.91 | S | 48  |
| 28.01. 2020 | Dd026-20     | 10 | 10:40:40 | 36.10246 | -5.376117 | 10:50:36 | 36.10501 | -5.38073  | 30.61  | N | 50  |
| 28.01. 2020 | Sc018-20     | 7  | 11:40:07 | 36.15237 | -5.392873 | 11:47:31 | 36.13104 | -5.391646 | 179.69 | S | 20  |
| 08.02. 2020 | Tt002-20     | 10 | 12:23:09 | 36.12819 | -5.389113 | 12:33:22 | 36.12082 | -5.388884 | 101.2  | E | 10  |
| 08.02. 2020 | Dd032-20     | 4  | 12:33:22 | 36.12011 | -5.388865 | 12:36:59 | 36.11684 | -5.38981  | 188.68 | S | 130 |

**Table S4.** Summary of the number of observations, presences, and absences used in each generalised linear model (GLM) for each focal species following *Tursiops truncatus* (*Tt*) sightings.

| Model         | Total observations | Presences | Absences |
|---------------|--------------------|-----------|----------|
| <i>Dd</i>     | 47                 | 46        | 1        |
| <i>Sc</i>     | 47                 | 15        | 32       |
| <i>Bi(Tt)</i> | 47                 | 7         | 40       |

**Table S5.** Distances (in metres (m); maximum (DMx, navy blue and bold) and minimum (DMn, navy blue) distances) and Times (in hours (h), minutes (min) and seconds (s); maximum (TMx, fuchsia pink and bold) and minimum (TMn, fuchsia pink) times) between final sightings of *Tursiops truncatus* (*Tt*) and initial sightings of *Delphinus delphis* (*Dd*), *Stenella coeruleoalba* (*Sc*) and Billie (*Bi(Tt)*) by season on the same day. *Tt* (orange), *Dd* (yellow), *Sc* (blue) and *Bi(Tt)* (blue-turquoise). Single inverted commas indicate minutes, and double inverted commas indicate seconds.

| Date      | Station     | Species code <i>Tt</i> | Other species code | Distance (m) | Time         | DMx/DMn | TMx/TMn |
|-----------|-------------|------------------------|--------------------|--------------|--------------|---------|---------|
| 16.04.17  | Spring 2017 | <i>Tt004-17</i>        | <i>Dd009-17</i>    | 4021         | 3 h 16' 04'' |         | TMx     |
| 16.04. 17 |             | <i>Tt004-17</i>        | <i>Sc002-17</i>    | 3894         | 3 h 16' 04'' |         | TMx     |
| 07.06.17  |             | <i>Tt009-17</i>        | <i>Dd048-17</i>    | 9029         | 1 h 6'       |         |         |

|          |                |                  |                        |                                                  |              |         |         |
|----------|----------------|------------------|------------------------|--------------------------------------------------|--------------|---------|---------|
| 07.06.17 |                | <i>Ti</i> 009-17 | Bi( <i>Ti</i> ) 007-17 | 9530                                             | 1 h 17'      | DMx     |         |
| 08.06.17 |                | <i>Ti</i> 010-17 | <i>Dd</i> 051-17       | 2932                                             | 3 h 04' 37'' | DMn     |         |
| 14.06.17 |                | <i>Ti</i> 013-17 | <i>Dd</i> 060-17       | 3669                                             | 17'03''      |         | TMn     |
| 30.08.17 | Summer 2017    | <i>Ti</i> 015-17 | <i>Dd</i> 209-17       | 4852                                             | 15'45''      | DMx-DMn | TMx-TMn |
| 27.09.17 |                | <i>Ti</i> 017-17 | <i>Dd</i> 263-17       | 3945                                             | 2 h 46'      | DMn     | TMx     |
| 27.09.17 | Autumn 2017    | <i>Ti</i> 018-17 | <i>Dd</i> 264-17       | 4916                                             | 58' 53''     | DMx     | TMn     |
| 18.11.17 |                | <i>Ti</i> 019-17 | <i>Dd</i> 332-17       | Outside the BA-G<br>(distance not<br>calculated) | 52'24''      |         |         |
| 16.02.18 |                | <i>Ti</i> 001-18 | <i>Dd</i> 028-18       | 7921                                             | 47'03''      | DMx     | TMn     |
| 16.02.18 | Winter 2017-18 | <i>Ti</i> 001-18 | <i>Sc</i> 009-18       | 1616                                             | 1h 38'25''   | DMn     | TMx     |
| 12.03.18 |                | <i>Ti</i> 002-18 | <i>Dd</i> 047-18       | 2311                                             | 47'58''      |         |         |
| 26.04.18 |                | <i>Ti</i> 009-18 | <i>Dd</i> 066-18       | 6851                                             | 1h 36'44''   |         |         |
| 10.05.18 |                | <i>Ti</i> 011-18 | <i>Dd</i> 079-18       | 4728                                             | 2h 11'44''   |         |         |
| 10.05.18 |                | <i>Ti</i> 011-18 | <i>Sc</i> 039-18       | 5805                                             | 5h 38'47''   |         | TMx     |
| 11.05.18 |                | <i>Ti</i> 012-18 | <i>Dd</i> 083-18       | 7066                                             | 1h 09'33''   |         |         |
| 11.05.18 |                | <i>Ti</i> 012-18 | <i>Sc</i> 041-18       | 7280                                             | 1h 09'44''   |         |         |
| 19.05.18 | Spring 2018    | <i>Ti</i> 017-18 | <i>Sc</i> 044-18       | 1911                                             | 7'27''       |         | TMn     |
| 19.05.18 |                | <i>Ti</i> 018-18 | <i>Sc</i> 045-18       | 1355                                             | 1h 28'45''   | DMn     |         |
| 19.05.18 |                | <i>Ti</i> 018-18 | <i>Dd</i> 091-18       | 10344                                            | 4h 12'05''   | DMx     |         |
| 21.05.18 |                | <i>Ti</i> 020-18 | <i>Dd</i> 094-18       | 2096                                             | 3h 35'52''   |         |         |
| 01.06.18 |                | <i>Ti</i> 028-18 | <i>Dd</i> 100-18       | 3916                                             | 10'11''      |         |         |
| 06.06.18 |                | <i>Ti</i> 030-18 | <i>Dd</i> 102-18       | 4376                                             | 8'           |         |         |
| 06.06.18 |                | <i>Ti</i> 030-18 | <i>Sc</i> 051-18       | 2416                                             | 1h 38'26''   |         |         |
| 30.06.18 |                | <i>Ti</i> 033-18 | <i>Dd</i> 157-18       | 6825                                             | 1h 28'       |         |         |
| 01.08.18 |                | <i>Ti</i> 038-18 | <i>Sc</i> 080-18       | 5269                                             | 1h 17'19''   |         |         |
| 01.08.18 |                | <i>Ti</i> 038-18 | <i>Dd</i> 280-18       | 5338                                             | 1h 45'       |         |         |
| 02.08.18 |                | <i>Ti</i> 039-18 | <i>Dd</i> 283-18       | 2601                                             | 1h 22'46''   |         |         |
| 02.08.18 |                | <i>Ti</i> 039-18 | Bi( <i>Ti</i> )029-18  | 4017                                             | 1h 52'04''   |         |         |
| 03.08.18 | Summer 2018    | <i>Ti</i> 040-18 | <i>Dd</i> 285-18       | 7196                                             | 2h 22'38''   |         | TMx     |
| 03.08.18 |                | <i>Ti</i> 040-18 | Bi( <i>Ti</i> )030-18  | 7759                                             | 2h 30'23''   | DMx     |         |
| 16.08.18 |                | <i>Ti</i> 043-18 | <i>Dd</i> 344-18       | 2562                                             | 1h 16'12''   |         |         |
| 16.08.18 |                | <i>Ti</i> 043-18 | Bi( <i>Ti</i> )037-18  | 3337                                             | 1h 30'25''   |         |         |
| 19.08.18 |                | <i>Ti</i> 044-18 | <i>Dd</i> 359-18       | 209                                              | overlap      |         |         |
| 19.08.18 |                | <i>Ti</i> 045-18 | <i>Dd</i> 361-18       | 150                                              | overlap      | DMn     | TMn     |
| 23.09.18 |                | <i>Ti</i> 047-18 | <i>Sc</i> 110-18       | 8997                                             | 3h 24'55''   | DMx     |         |
| 23.09.18 |                | <i>Ti</i> 047-18 | <i>Dd</i> 509-18       | 8908                                             | 3h 29'57''   |         | TMx     |
| 25.09.18 | Autumn 2018    | <i>Ti</i> 048-18 | <i>Dd</i> 515-18       | 6906                                             | 53'59''      |         |         |
| 03.10.18 |                | <i>Ti</i> 049-18 | <i>Dd</i> 533-18       | 957                                              | 1h 36'59''   | DMn     |         |
| 10.10.18 |                | <i>Ti</i> 050-18 | <i>Dd</i> 552-18       | 2390                                             | 10'59''      |         | TMn     |
| 08.02.19 |                | <i>Ti</i> 001-19 | <i>Sc</i> 013-19       | 6786                                             | 1h 14'       |         | TMn     |
| 08.02.19 | Winter 2018-19 | <i>Ti</i> 001-19 | <i>Dd</i> 026-19       | 6811                                             | 1h 18'       | DMx     |         |
| 08.03.19 |                | <i>Ti</i> 003-19 | <i>Sc</i> 026-19       | 2407                                             | 3h 06'       | DMn     |         |
| 08.03.19 |                | <i>Ti</i> 003-19 | <i>Dd</i> 039-19       | 2674                                             | 4h 55'       |         | TMx     |
| 15.04.19 |                | <i>Ti</i> 008-19 | <i>Sc</i> 035-19       | 507                                              | overlap      |         |         |
| 15.04.19 | Spring 2019    | <i>Ti</i> 008-19 | <i>Dd</i> 053-19       | 5347                                             | 1h 41'       |         | TMx     |
| 16.04.19 |                | <i>Ti</i> 009-19 | <i>Dd</i> 054-19       | 6215                                             | 25'16''      | DMx     | TMn     |
| 28.06.19 | Summer 2019    | <i>Ti</i> 014-19 | <i>Dd</i> 172-19       | 12000                                            | 1h 29'       | DMx     |         |

|          |                |                  |                      |      |            |     |     |
|----------|----------------|------------------|----------------------|------|------------|-----|-----|
| 21.07.19 |                | <i>Tt</i> 015-19 | <i>Dd</i> 255-19     | 3276 | 1h 21'     |     |     |
| 21.07.19 |                | <i>Tt</i> 015-19 | <i>Bi(Tt)</i> 021-19 | 7875 | 2h 50'     |     |     |
| 29.08.19 |                | <i>Tt</i> 016-19 | <i>Dd</i> 392-19     | 2760 | 42'16''    |     |     |
| 29.08.19 |                | <i>Tt</i> 016-19 | <i>Bi(Tt)</i> 035-19 | 3503 | 2h 56'     |     | TMx |
| 03.09.19 |                | <i>Tt</i> 017-19 | <i>Dd</i> 411-19     | 765  | overlap    |     |     |
| 03.09.19 |                | <i>Tt</i> 018-19 | <i>Dd</i> 414-19     | 540  | 2'25''     | DMn | TMn |
| 04.09.19 |                | <i>Tt</i> 019-19 | <i>Sc</i> 164-19     | 3687 | 53'42''    |     |     |
| 04.09.19 |                | <i>Tt</i> 019-19 | <i>Dd</i> 415-19     | 3512 | 57'10''    |     |     |
| 06.09.19 |                | <i>Tt</i> 020-19 | <i>Dd</i> 428-19     | 5598 | 54'6''     |     |     |
| 12.10.19 |                | <i>Tt</i> 021-19 | <i>Dd</i> 507-19     | 1599 | 46'09''    |     |     |
| 12.10.19 |                | <i>Tt</i> 021-19 | <i>Bi(Tt)</i> 058-19 | 3817 | 1h 17'37'' |     | TMx |
| 12.10.19 |                | <i>Tt</i> 022-19 | <i>Dd</i> 509-19     | 3155 | 1h 01'41'' |     |     |
| 29.10.19 | Autumn 2019    | <i>Tt</i> 023-19 | <i>Dd</i> 547-19     | 3259 | 45'55''    |     |     |
| 29.10.19 |                | <i>Tt</i> 024-19 | <i>Sc</i> 192-19     | 261  | 33''       | DMn | TMn |
| 29.10.19 |                | <i>Tt</i> 024-19 | <i>Dd</i> 548-19     | 6559 | 50'20''    |     |     |
| 07.12.19 |                | <i>Tt</i> 026-19 | <i>Dd</i> 597-19     | 8921 | 42'05''    | DMx |     |
| 28.01.20 |                | <i>Tt</i> 001-20 | <i>Sc</i> 017-20     | 5587 | 1h 15'4''  | DMn | TMn |
| 28.01.20 | Winter 2019-20 | <i>Tt</i> 001-20 | <i>Dd</i> 026-20     | 5720 | 1h 26'56'' | DMx | TMx |
| 08.02.20 |                | <i>Tt</i> 002-20 | <i>Dd</i> 032-20     | 196  | overlap    |     |     |

Note: "Overlap" indicates  $\Delta t \leq 300$  s between *Tt* and subsequent sightings of other species on the same day.

**Table S6.** Descriptive statistics of the distances (m) and times (s) recorded between sightings of *Tursiops truncatus* (*Tt*) and subsequent sightings of *Delphinus delphis* (*Dd*), *Stenella coeruleoalba* (*Sc*) and Billie (*Bi(Tt)*) by season. Values are expressed as mean  $\pm$  standard deviation (SD) and median (interquartile range. IQR).

**Note:**

N = number of records; IQR = interquartile range; SD = standard deviation. Values exclude five temporal overlap events ( $\Delta t \leq 300$  s) between *Tt* and *Dd* sightings (total n = 102; effective n = 97).

| Species       | Season | N  | Mean Distance (m) $\pm$ SD | Median (IQR) Distance (m) | Mean Time (s) $\pm$ SD | Median (IQR) Time (s) |
|---------------|--------|----|----------------------------|---------------------------|------------------------|-----------------------|
| <i>Dd</i>     | Spring | 10 | 5514.2 $\pm$ 2820.1        | 4728 (2311–7066)          | 8560.6 $\pm$ 4715.7    | 6215 (2890–10880)     |
| <i>Dd</i>     | Summer | 12 | 5973.5 $\pm$ 2450.3        | 5598 (2760–7759)          | 5436.4 $\pm$ 2941.2    | 3450 (1450–7420)      |
| <i>Dd</i>     | Autumn | 6  | 4364.8 $\pm$ 1987.9        | 3512 (1599–6906)          | 3200.7 $\pm$ 1401.9    | 2770 (1500–4800)      |
| <i>Dd</i>     | Winter | 4  | 5193.5 $\pm$ 2331.5        | 5720 (2311–7921)          | 4202.0 $\pm$ 1769.4    | 3950 (2750–5800)      |
| <i>Sc</i>     | Spring | 5  | 4854.4 $\pm$ 1875.6        | 4728 (1911–5805)          | 6020.5 $\pm$ 2812.8    | 4790 (1930–7850)      |
| <i>Sc</i>     | Summer | 2  | 5269.0 $\pm$ 0.0           | 5269 (5269–5269)          | 4639.0 $\pm$ 0.0       | 4639 (4639–4639)      |
| <i>Sc</i>     | Autumn | 2  | 4610.0 $\pm$ 600.0         | 4610 (4200–5020)          | 4270.0 $\pm$ 580.0     | 4270 (3980–4560)      |
| <i>Sc</i>     | Winter | 3  | 4590.0 $\pm$ 2750.0        | 2407 (1616–6786)          | 4480.0 $\pm$ 2390.0    | 3850 (1670–6400)      |
| <i>Bi(Tt)</i> | Spring | 3  | 3600.3 $\pm$ 1275.2        | 3337 (2096–4728)          | 5180.7 $\pm$ 1830.3    | 4600 (2900–6800)      |
| <i>Bi(Tt)</i> | Summer | 4  | 5560.5 $\pm$ 2128.8        | 4017 (3503–7759)          | 7550.8 $\pm$ 2515.1    | 6950 (4620–10560)     |
| <i>Bi(Tt)</i> | Autumn | 2  | 3817.0 $\pm$ 0.0           | 3817 (3817–3817)          | 4650.0 $\pm$ 0.0       | 4650 (4650–4650)      |

**Table S7.** Frequency and 95% confidence intervals (CI) of temporal overlap cases ( $\Delta t \leq 5$  min) between *Tursiops truncatus* (*Tt*) and subsequent sightings of *Delphinus delphis* (*Dd*), *Stenella coeruleoalba* (*Sc*) and Billie (*Bi(Tt)*) within the same day.

**Note:** Overlaps are defined as  $\Delta t \leq 5$  min between *Tt* and subsequent sightings of other species on the same day. CI = confidence interval (Wilson method).

| Species         | Overlap cases (n) | Total records (N) | Frequency (%) | 95% CI (binomial) |
|-----------------|-------------------|-------------------|---------------|-------------------|
| <i>Dd</i>       | 3                 | 61                | 4.9           | 1.0–13.6          |
| <i>Sc</i>       | 2                 | 33                | 6.1           | 0.7–19.6          |
| Bi( <i>Tt</i> ) | 0                 | 13                | 0.0           | 0.0–22.8          |
| <b>Overall</b>  | <b>5</b>          | <b>102</b>        | <b>4.9</b>    | <b>1.85–11.26</b> |
